# Supplementary material for: Neural mechanisms of credit assignment for delayed outcomes during contingent learning
Source: PubMed Central journal article supplement (PMC11326259; doi:10.1101/2024.08.06.606895), 2024-08-08
Supplement: NIHPP2024.08.06.606895v1-supplement-1.pdf [file NIHPP2024.08.06.606895v1-supplement-1.pdf]

## Supplemental Figures

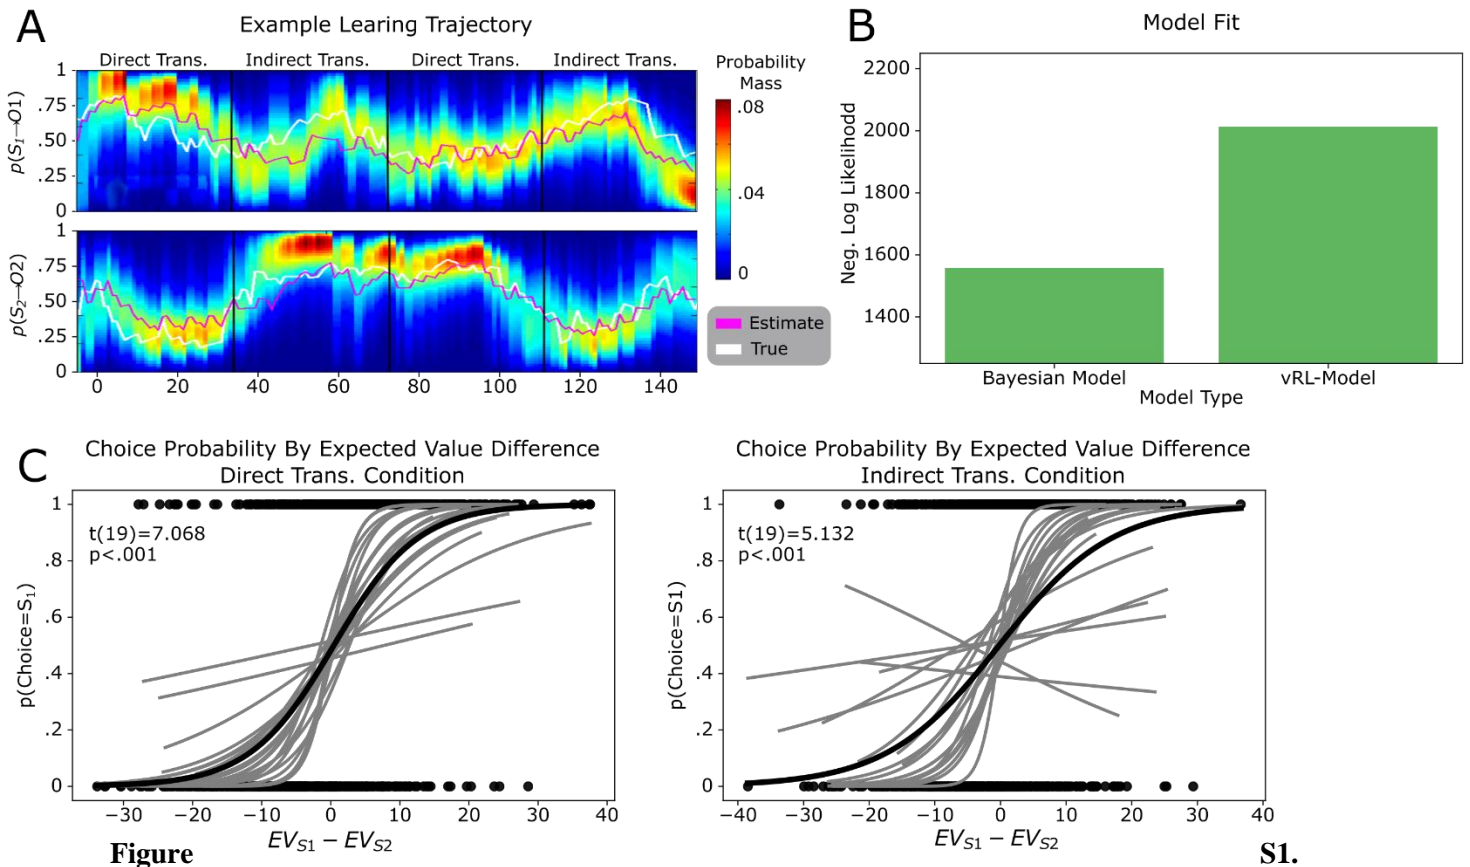

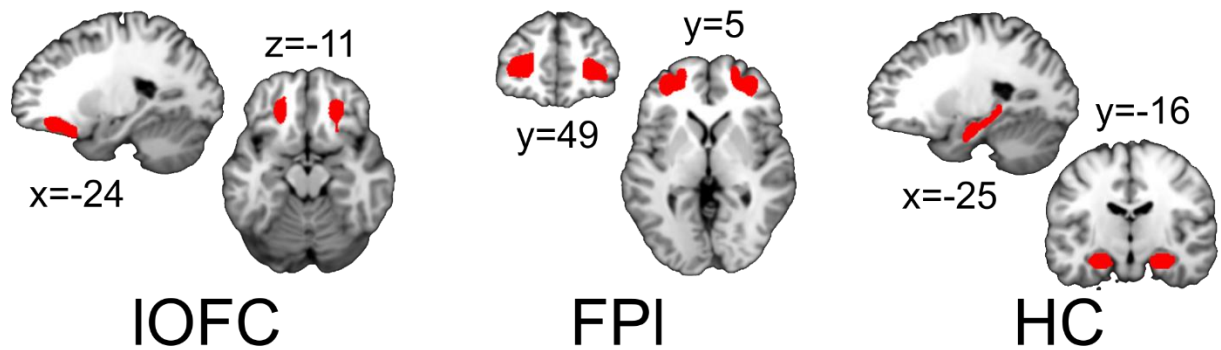

**Figure S2. Pre-selected anatomical ROIs**

Illustrations of pre-selected anatomical ROIs taken from Neubert et al, 2015. The IOFC ROI corresponds to index 9 and 30, FPI corresponds to indexes 14 and 35. The HC ROI was defined in Yushkevich et al., 2015.

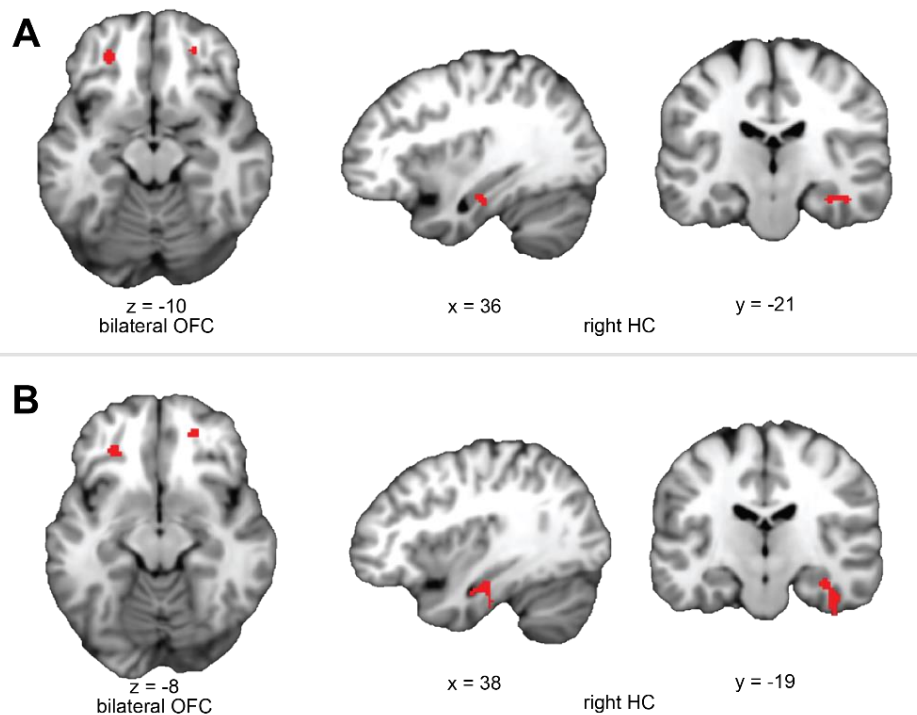

**Figure S3. Functionally defined ROIs for in the direct transitions condition.**

A) Despite having *a priori* defined anatomical ROIs for our decoding analysis of the causal choice, we wanted to test whether our results depended on these ROI definitions by using a data-driven approach. Here, we trained an SVM classifier to decode representations of the causal choice in run 1 of the direct transition condition, then tested the decoder on run 2 to find regions of the orbitofrontal cortex (OFC) and

hippocampus (HC) that significantly decoded causal choice representations at a significance level of  $t(19) > 2.54$ ,  $p < .01$ , uncorrected. We then used these regions as ROIs for a separate analysis which trained the classifier in run 1 and tested the classifier in run 2. B) Shows ROIs generated from the same procedure as described in A, but the use of each run for training and testing are switched.

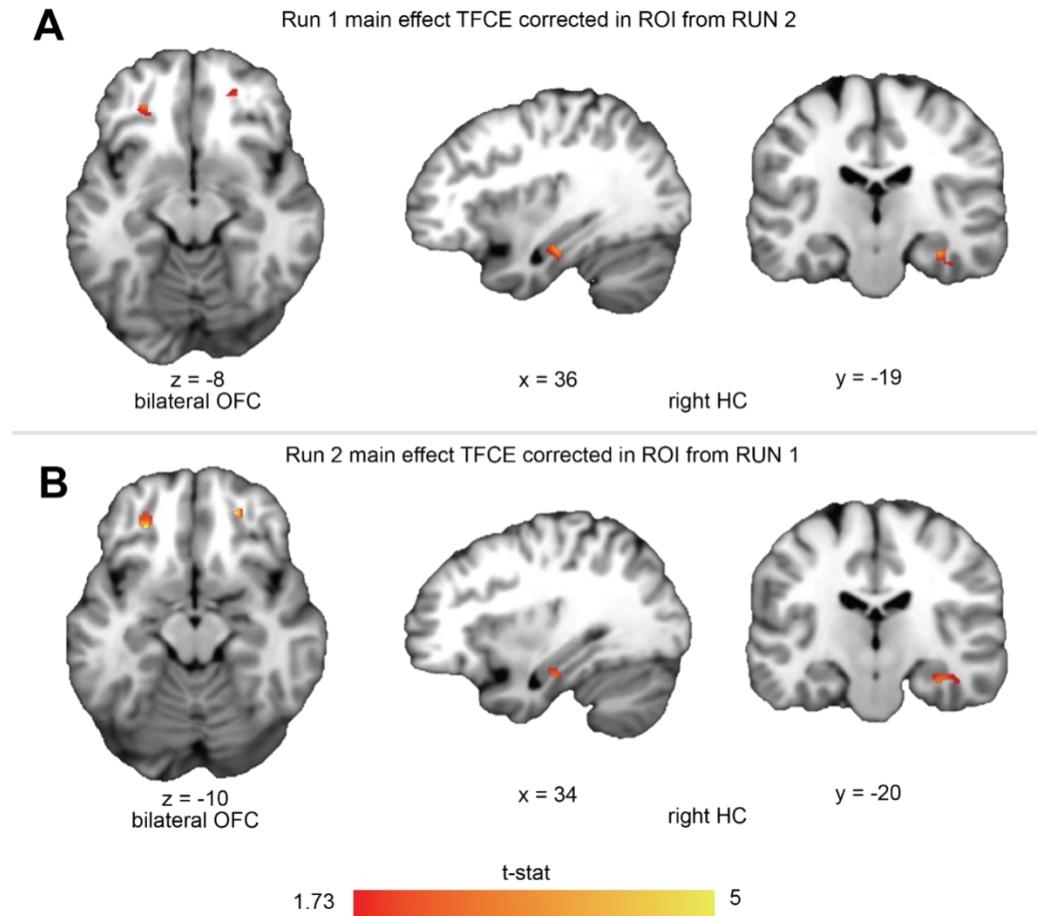

**Figure S4. Main effect of choice decoding accuracy at the time of feedback TFCE corrected in each run of the direct transition condition**

A. Regions of the OFC showing significant decoding of the causal choice in run 1 of the direct transition condition. Significance was tested using TFCE correction over voxels with the ROI generated from run 2, using the procedure described above (Fig.S1). For illustration, we show voxels that survive at threshold to  $t(19)=1.73$ ,  $p<.05$  uncorrected. B. Shows the same as A but for voxels in run 2, using the ROI generated from run 1.

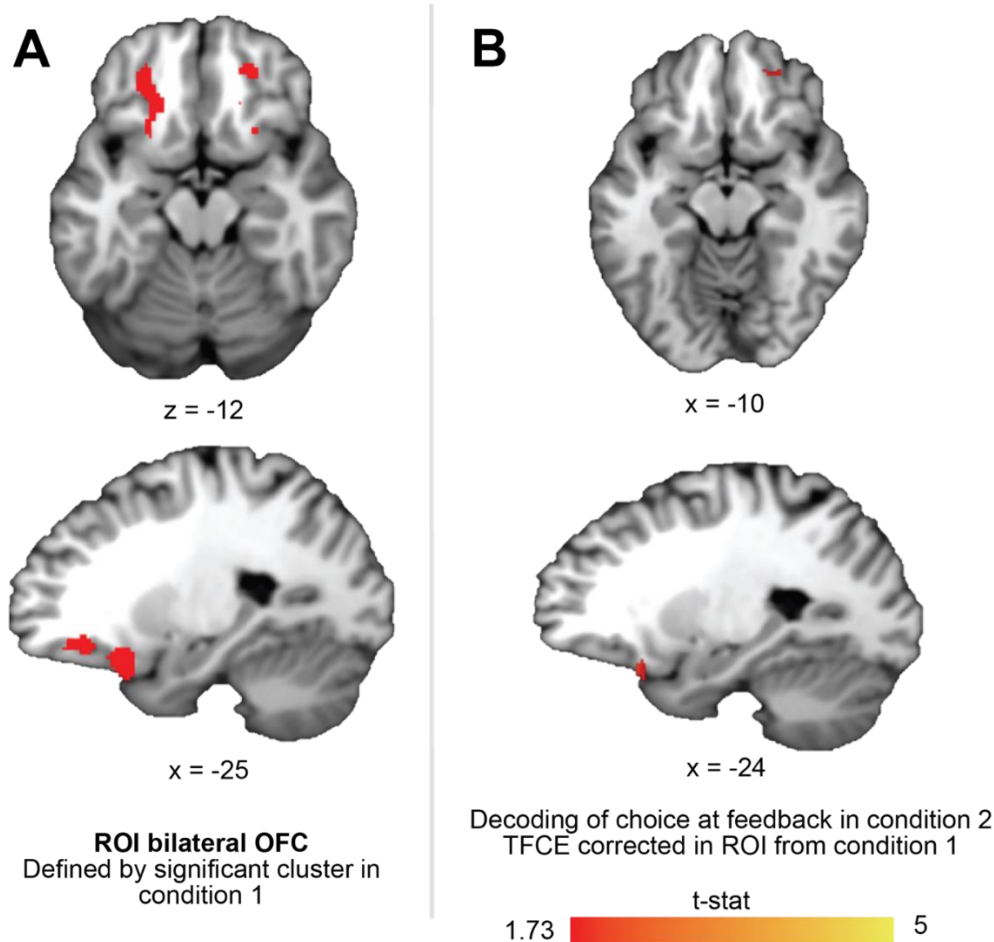

**Figure S5. Significant information connectivity between FPI and OFC in functionally defined ROI from direct transition condition**

A. We did not observe significant decoding of the causal choice *a* in bilateral OFC ROI defined by significant cluster in in the idirected transition condition. Thus, we used the accuracy map for decoding choices at feedback during the direct transition condition ( $t(19) > 1.73$ ;  $p < .05$ ) in the OFC, averaged across runs. B) We then used those cluster as ROI for TFCE correction for regions of the IOFC that showed significant information connectivity with FPI. We did this by testing for significant correlations between the trial-by-trial fidelity of pending representations in the FPI and causal choice representation during feedback in IOFC (see Methods).

**A.**

Catch trial  
(during template task)

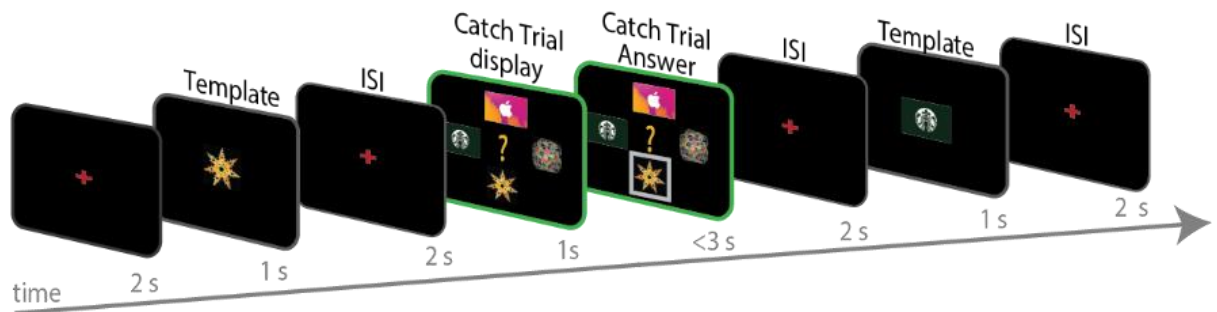

**B.**

Bonus trials  
(during decision task)

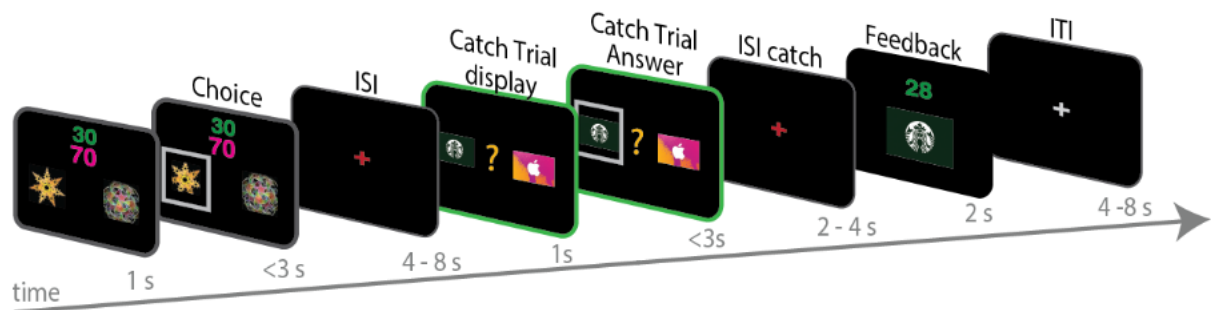

**Figure S6. Depiction of catch trials**

A. To ensure that participants where we included valuable *catch trials* in the passive observing “template task”. Participants were asked to report which image out of the four (2 gift cards and 2 stimuli) was the last one presented on the screen. They were endowed an extra £10 from which we removed £1 for every incorrect response. There were four catch trials per template run. B. The decision task included “bonus trials” in which participants could predict which gift card they expected to see on the subsequent feedback screen given their choice. They were given 3£ extra on the final gift card that was given to them for every correct answer. The first run of the direct transition condition had two catch trials; the second run had one. Both runs of the indirect transition condition had one catch trial each.

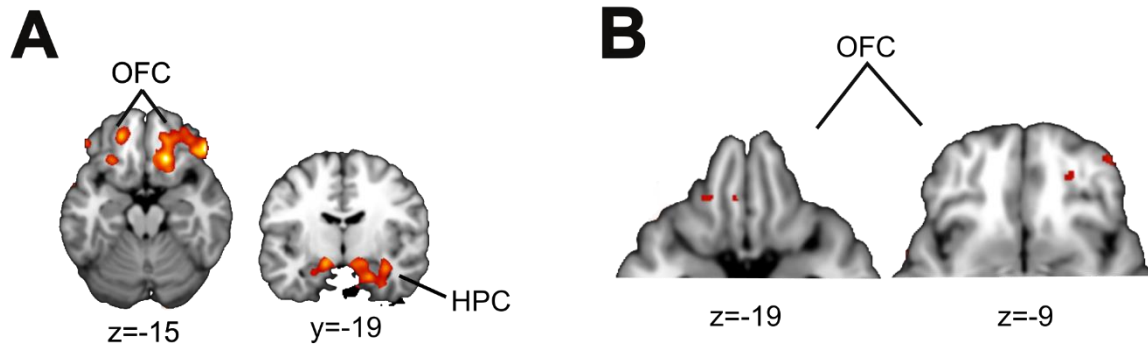

**Figure S7. Control Analysis for Pending-to-Credit Assignment Information Connectivity in the Indirect Transition Condition**

A. Axial (left) and coronal (right) slices through a t-statistic map showing the results of a control analysis in which test the proportion of correct classifications of causal stimulus information in OFC and HPC at the time of the outcome for trials in which the FPI showed correct classification for the causal stimulus during pending trials. The proportion of correct trials was compared to a permuted baseline of randomly drawn trials for each participant then combined over participants to create a t-statistic. B. Secondary control analysis in which we reran the classification analysis for causal choice stimulus information at the time of outcome, but only on trials where FPI was found to correctly decode pending causal choice information. Note that this test is different from A because we allowed the classifier to create a new hyperplane separating categories for only those trials in which the FPI decoding was “correct”. For illustration, all maps are displayed at threshold of  $t(19) = 2.54$ ,  $p < .01$  uncorrected. All effects survive small volume correction in a priori defined anatomical ROIs.
